# Supplementary material for: Comprehensive Assessment of the Association of WNK4 Polymorphisms with Hypertension: Evidence from a Meta-Analysis
Source: PubMed Central journal article supplement (PMC4195396; doi:10.1038/srep06507), 2014-09-30
Supplement: srep06507-s1.pdf [file srep06507-s1.pdf]

Supporting Information for:

## Comprehensive Assessment of the Association of *WNK4* Polymorphisms with Hypertension: Evidence from a Meta-Analysis

Xiao-gang GUO<sup>1</sup>, Jie DING<sup>1</sup>, Hui XU<sup>1,2</sup>, Tian-ming Xuan<sup>1</sup>, Wei-quan Jin<sup>1</sup>, Xiang YIN<sup>1</sup>, Yun-peng Shang<sup>1</sup>, Fu-rong ZHANG<sup>1</sup>, Jian-hua ZHU<sup>1</sup> & Liang-rong ZHENG<sup>1</sup>

<sup>1</sup>Department of Cardiology, the First Affiliated Hospital, School of Medicine, Zhejiang University, Hangzhou 310003, China; <sup>2</sup>Xiuzhou District, Gaozhao Street Community Health Service Center, Jiaxing 314031, China

### 1. Sensitivity Analysis

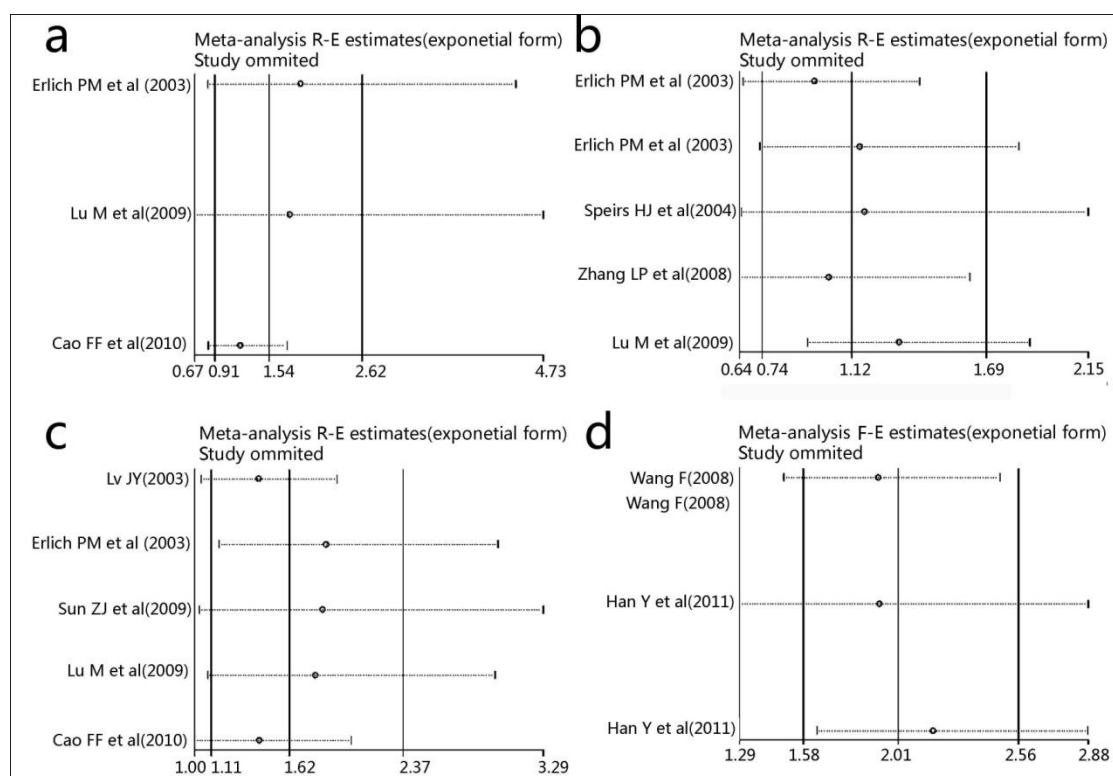

**Supplementary Fig. S1 | Sensitivity analysis to examine the influence of individual studies on the pooled ORs under allele contrast.** The circles represent the pooled ORs when the given named study on the left is omitted, and the dotted lines indicate the 95% CIs. a: C1155547T polymorphism and hypertension; b: for G1156666A polymorphism and hypertension; c: G1155942T polymorphism and hypertension; d: C6749T polymorphism and hypertension; R-E: random effects; F-E: fixed effects.

## 2. Cumulative meta-analysis

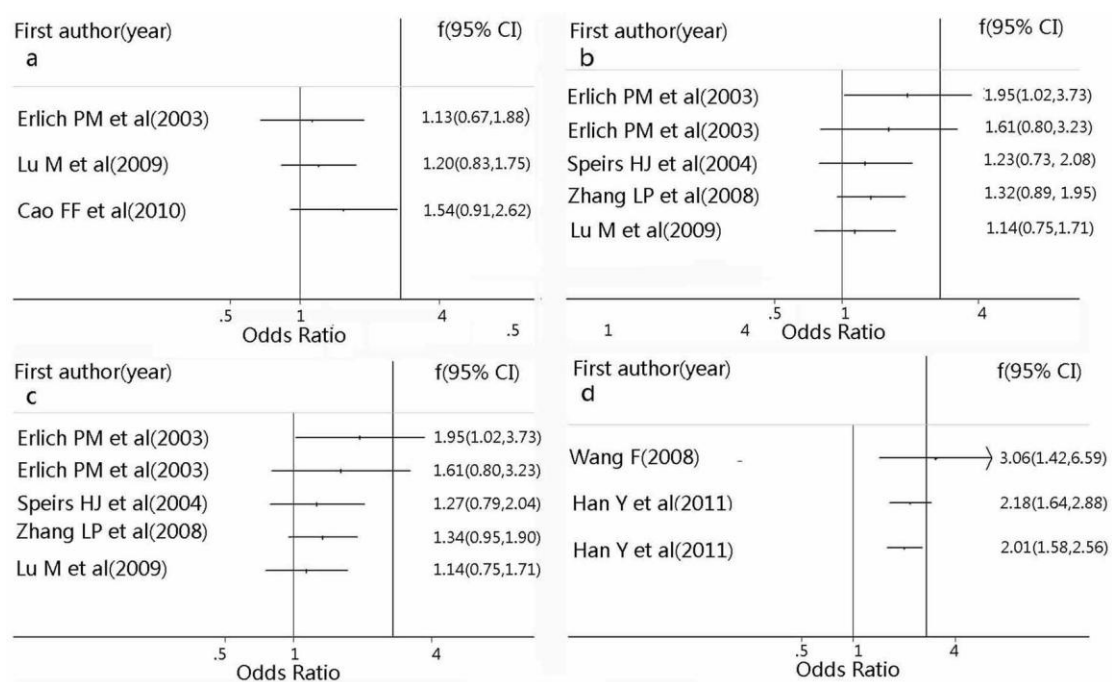

**Supplementary Fig. S2| Cumulative meta-analysis of the association between *WNK4* SNPs and hypertension under allele contrasts. a: C1155547T polymorphism; b: G1156666A polymorphism; c: G1155942T polymorphism; d: C6749T polymorphism.**
